# Supplementary material for: De novo sequencing and analysis of the transcriptome of two highbush blueberry (V. corymbosum L.) cultivars ‘Bluecrop’ and ‘Legacy’ at harvest and following post-harvest storage
Source: Research Square preprint supplement (doi:10.21203/rs.3.rs-42248/v2), 2021-01-21
Supplement: Supplementary file 1 [file cd87ebdda49acf39017d6e1a.docx]

Additional file 1. Summary of RNAseq data and sequence assembly

|  | Before and after trimming and quality control | | | | | | | |
| --- | --- | --- | --- | --- | --- | --- | --- | --- |
|  | Bluecrop | | | | Legacy | | | |
| Sequences | Harvest | 21 dph | 24 dph | Leaf | Harvest | 21 dph | 24 dph | Leaf |
| Number of raw reads | 67717387 | 72118586 | 80410832 | 22557244 | 67910891 | 64930867 | 84403728 | 22772432 |
| Number of cleaned reads | 65955465 | 70162861 | 77642138 | 21868295 | 66826263 | 63855731 | 81854546 | 22411915 |
| Number of assembled transcripts | 273834 | 309212 | 316512 | 155656 | 293774 | 359820 | 347551 | 105387 |
